# Supplementary material for: An efficient counter electrode material for dye-sensitized solar cells—flower-structured 1T metallic phase MoS2
Source: Royal Society of Chemistry journal article supplement (doi:10.1039/c6ta04743b), 2016-01-01
Supplement: c6ta04743b1.pdf [file c6ta04743b1.pdf]

Supporting Information

**Efficient Counter Electrode Material for Dye-sensitized Solar Cells— Flower-structured**

**1T Metallic Phase MoS<sub>2</sub>**

Wei Wei<sup>1</sup>, Kai Sun<sup>2</sup>, and Yun Hang Hu<sup>1,\*</sup>

<sup>1</sup>Department of Materials Science and Engineering, Michigan Technological University, 1400

Townsend Drive, Houghton, MI 49931-1295, USA

<sup>2</sup>Department of Materials Science and Engineering, University of Michigan, Ann Arbor, MI

48109-2136, USA

## 1. Experimental section

### 1.1 Synthesis and characterization of MoS<sub>2</sub>.

MoS<sub>2</sub> was synthesized via a typical hydrothermal method: 1mmol of Na<sub>2</sub>MoO<sub>4</sub>·2H<sub>2</sub>O and 5mmol of thiourea were dissolved in 60ml of distilled water and stirred vigorously. Then, the obtained mixture was transferred into a 100ml Teflon-lined autoclave. A FTO glass was placed against the wall of the autoclave. The whole system was kept for reactions at 180 or 200 °C for 24h, which are denoted as MoS<sub>2</sub>-180 and MoS<sub>2</sub>-200. Finally, the FTO glass covered with MoS<sub>2</sub> film was rinsed with distilled water and ethanol, and then dried in an oven at 80 °C for 12h. MoS<sub>2</sub> samples were scraped down from the surface of FTO glass before characterization. The products were subjected to X-ray diffraction (XRD) measurements using a Scintag XDS-2000 powder diffract meter with Cu K $\alpha$  ( $\lambda=1.5406\text{\AA}$ ) radiation. Structures of the samples were characterized by Hitachi-4700 field emission scanning electron microscope (FESEM) with energy dispersive spectroscopy (EDS) and the HAADF-STEM images were obtained using a JEOL JEM3100R05 double Cscorrected analytical electron microscope. X-ray photoelectron spectra (XPS) were collected using a Kratos Ulta AXIS DLD XPS with a monochromated Al source. Raman spectra were obtained using an Olympus BX41 spectrometer with a helium-neon laser to excite the samples. Surface area and pore size distribution were measured with a Micromeritics ASAP 2000 surface area measurement analyzer using nitrogen adsorption at liquid-nitrogen temperature (77K). Before nitrogen adsorption measurement, the sample was degassed at 100°C.

### 1.2 Preparation and characterization of counter electrodes.

A piece of pre-cleaned FTO conducting glass was placed against the inside wall of the Teflon lined autoclave with conduction side facing up. The MoS<sub>2</sub> nanostructure films were directly grown

onto the FTO substrates. The obtained films were rinsed with DI-water and then dried at 80°C for four hours. The FTO glass plates with coated MoS<sub>2</sub> film were directly used as counter electrodes. Cyclic voltammetry measurements were carried out using an electrochemical workstation (EG&G Princeton Applied Research) with a three-electrode system (carbon nanomaterial as a working electrode, Pt wire as a counter electrode, and Ag/AgCl as a reference electrode) containing acetonitrile solution of 10 mM LiI, 1 mM I<sub>2</sub>, and 0.1 M LiClO<sub>4</sub>.

### 1.3 Preparation of photo electrodes.

FTO glass plates were ultrasonically washed with water and the conducting surface of the FTO was treated with a 0.4mM TiCl<sub>4</sub> aqueous solution at 70°C for 30 min. A commercial TiO<sub>2</sub> sol (Solaronix, Ti-Nanoxide T/SP) was used to form a TiO<sub>2</sub> film on a FTO by the doctor-blade method. The TiO<sub>2</sub> film was thermally treated in air at 325°C for 5min, 375°C for 5 min, 450°C for 15min, and 500°C for 15min. The obtained TiO<sub>2</sub>/FTO glass plate was post-treated with the 0.4mM TiCl<sub>4</sub> solvent at 70°C, followed by heating in air at 500°C for 30min. Finally, the obtained film was immersed in a cis-bis(isothiocyanato) bis(2,2'-bipyridyl-4,4'-dicarboxylato)-ruthenium(II)-bis-tetrabutylammonium (N719, 0.3 mM in ethanol) dye solution for 24 hours to achieve dye sensitization.

### 1.4 Fabrication and performance evaluation of DSSCs.

The sandwich solar cells were assembled using the dye-sensitized TiO<sub>2</sub> photoelectrode and the MoS<sub>2</sub> counter electrode with liquid electrolyte (I<sup>-</sup>/I<sub>3</sub><sup>-</sup> redox) between them. The electrolyte consists of 0.025 M LiI, 0.04 M I<sub>2</sub>, 0.28 M tert-butyl pyridine (TBP), 0.6 M 1-butyl-3-methylimidazolium iodide (BMII), and 0.05 M guanidinium thiocyanate in acetonitrile/valeronitrile solvent with 85/15 volume ratio. The effective cell area is 0.25cm<sup>2</sup>. The photovoltaic performance of the obtained

MoS<sub>2</sub>-based cells was evaluated by Kithley 2400 under illumination of 100Mw cm<sup>-2</sup> at the range of 320nm-1100nm using a solar simulator (Newport). Electrochemical impedance spectroscopy (EIS) data of DSSCs were obtained at open circuit voltage and 10 mV amplitude over the frequency range of 0.1-100 kHz using CHI 660D electrochemical workstation under dark condition.

## 2. FESEM images of 1Tphase MoS<sub>2</sub>

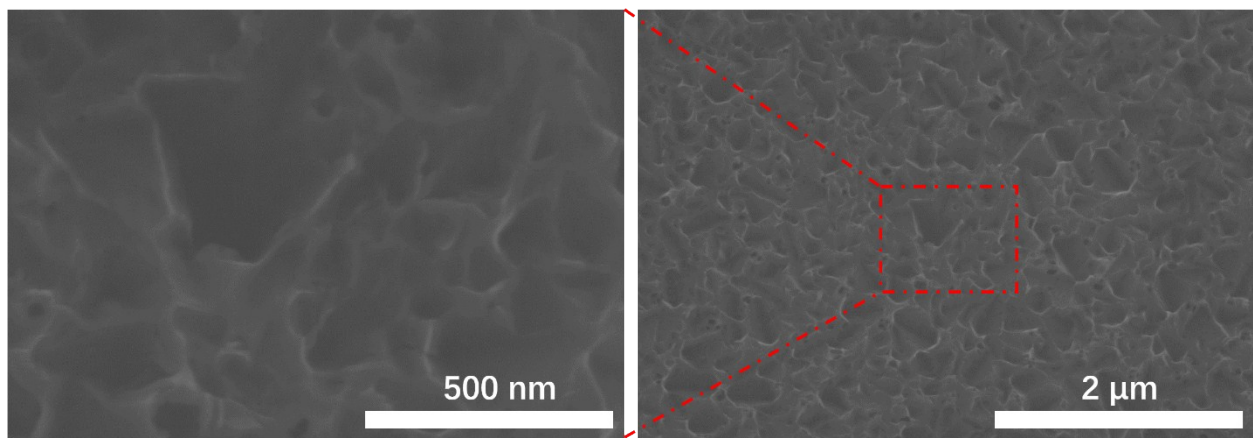

**Fig. S1** FESEM images of flower-structured 1T phase MoS<sub>2</sub>.

As shown in Fig. S1, the MoS<sub>2</sub> are composed of large, uniform nanosheets, which gathering together to form a flower-like structure.

### 3. Efficiency of DSSC with Pt as counter electrode

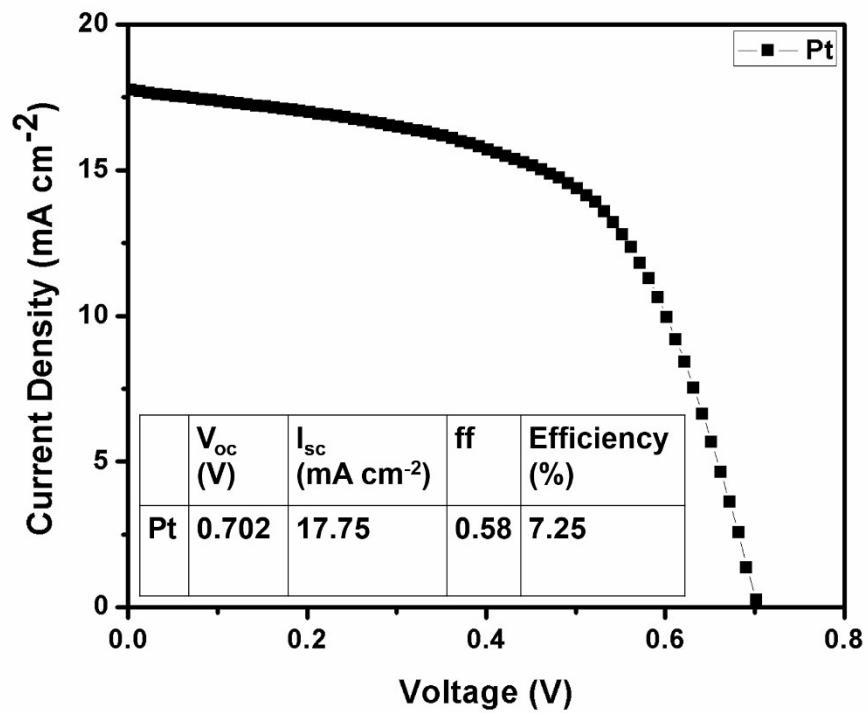

Fig. S2 J-V curve of DSSC with Pt counter electrode with photovoltaic parameter inset.
